# Supplementary material
Source: PubMed Central journal article supplement (PMC3026735)
Supplement: JCI44740sd.pdf [file JCI44740sd.pdf]

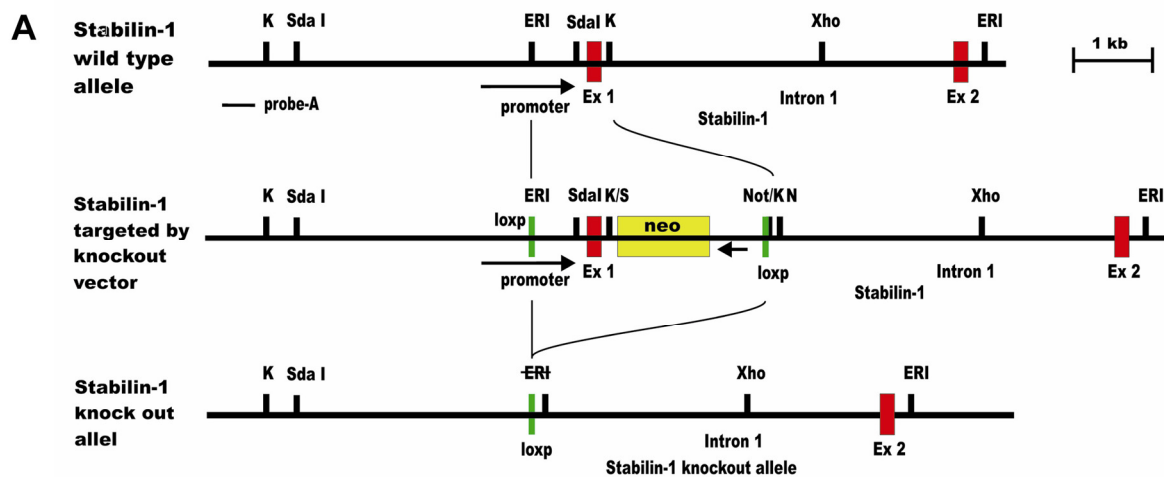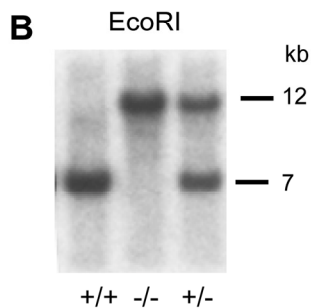

## Supplementary Figure 1

### Targeting strategy and generation of Stabilin-1 knockout allele.

(A) Structural organization of the Stabilin-1 wild-type, knockout vector targeted, and Stabilin-1 knockout allele. The 2 *loxP* sites flanking the Stabilin-1 exon 1 (red) are shown in green bars. The relative positions of probe-A used for Southern blot analysis and restriction endonuclease sites relevant for cloning procedures indicated as K (*KpnI*), Sda I (*SdaI*), ERI (*EcoRI*), Xho (*XhoI*), S (*SmaI*), Not (*NotI*) are indicated. Cre-mediated deletion of Stabilin-1 exon 1 was achieved by crossing heterozygous *Stab-1* *+/-* mice with C57BL/6 cre-deleter expressing constitutively recombinase cre. F2 mice were screened for Stabilin-1 *+/-* mice. First Stabilin-1 *+/-* mice of mixed 129-C57BL/6 genetic background have been continuously backcrossed to either C57BL/6 or Balb/c mouse strains. (B) Southern blot analysis (according to standard procedures) of *EcoRI*-digested genomic DNA using probe-A clearly discriminates Stabilin-1 WT, knockout, and heterozygous genotypes.

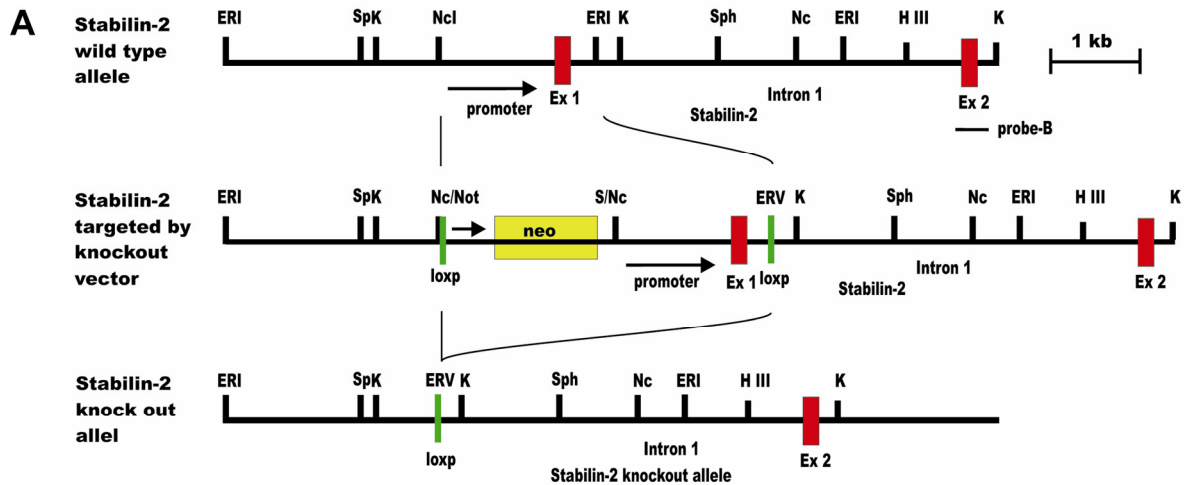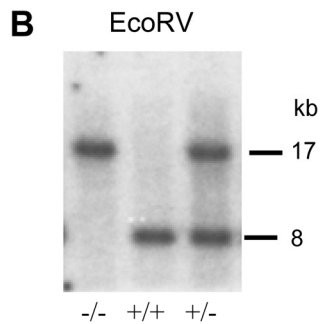

## Supplementary Figure 2

### Targeting strategy and generation of Stablin-2 knockout allele.

(A) Structural organization of the Stablin-2 wild-type, knockout vector targeted, and Stablin-2 knockout allele. The 2 loxP sites flanking the Stablin-2 exon 1 (red) are shown in green bars. The relative positions of probe-B used for Southern blot analysis and restriction endonuclease sites relevant for cloning procedures indicated as ERI (*EcoRI*), Sp (*SpeI*) K (*KpnI*), Nc (*NcoI*), Sph (*SphI*), H III (*HindIII*), S (*SmaI*), Xho (*XhoI*) are indicated. Cre-mediated deletion of Stablin-2 exon 1 was achieved by crossing heterozygous Stab-2 +/flox mice with C57BL/6 cre-deleter expressing constitutively recombinase cre. F2 mice were screened for Stablin-2 +/- mice. First Stablin-2 +/- mice of mixed 129-C57BL/6 genetic background have been continuously backcrossed to either C57BL/6 or Balb/c mouse strains. (B) Southern blot analysis (according to standard procedures) of *EcoRV*-digested genomic DNA using probe-B clearly discriminates Stablin-2 WT, knockout, and heterozygous genotypes.

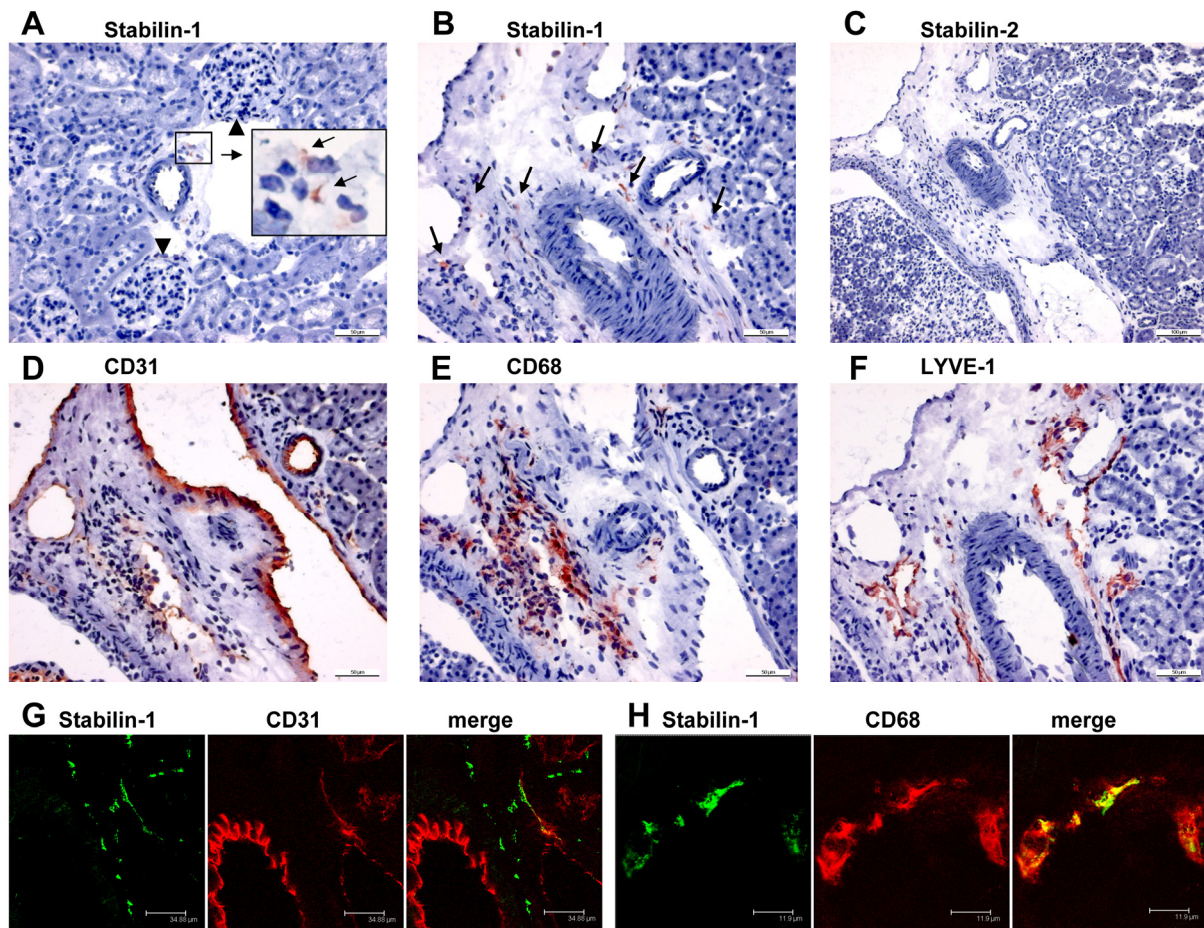

### Supplementary Figure 3

#### Stabilin-1 and Stabilin-2 expression in mouse kidney.

(A-F) Representative kidney sections of 2 month old C57BL/6 WT were stained by immunohistochemistry with antibodies against (A, B) Stabilin-1, (C) Stabilin-2, (D) vessel marker CD31 (serotec), (E) macrophage marker CD68 (Acris) and (F) lymph vessel marker LYVE-1 (Abcam). (A) Only few stabilin-1 positive single cells were found in mouse kidney and most of them were located perivascularly (boxed frame, arrows). No Stabilin-1 expression was detected in glomerular structures (arrowheads). (B) Close to larger vessels we observed a higher incidence of Stabilin-1 expressing single cells (arrows). (A, B) Original magnification 200x. Scale bar 50  $\mu\text{m}$ . (C) In contrast, no Stabilin-2 positive cells have been detected in mouse kidney. (Original magnification 100x. Scale bar 100  $\mu\text{m}$ ). (D-F) (Original magnification 200x. Scale bar 50  $\mu\text{m}$ ).

(G) Stabilin-1 positive cells were stained in green, whereas CD31 positive blood vessels appear in red. No overlapping signals indicate absence of stabilin-1 expression in CD31 positive blood vessels. (Original magnification 630x. Scale bar 35  $\mu\text{m}$ ). (H) In contrast, when stabilin-1 expressing cells (green) were tested against CD68 stained macrophages (red) a dominant overlap was observed within a subset of CD68 positive macrophages indicating a (locally) restricted stabilin-1 positive perivascular macrophage subpopulation. (Original magnification 630x. Scale bar 12  $\mu\text{m}$ ).

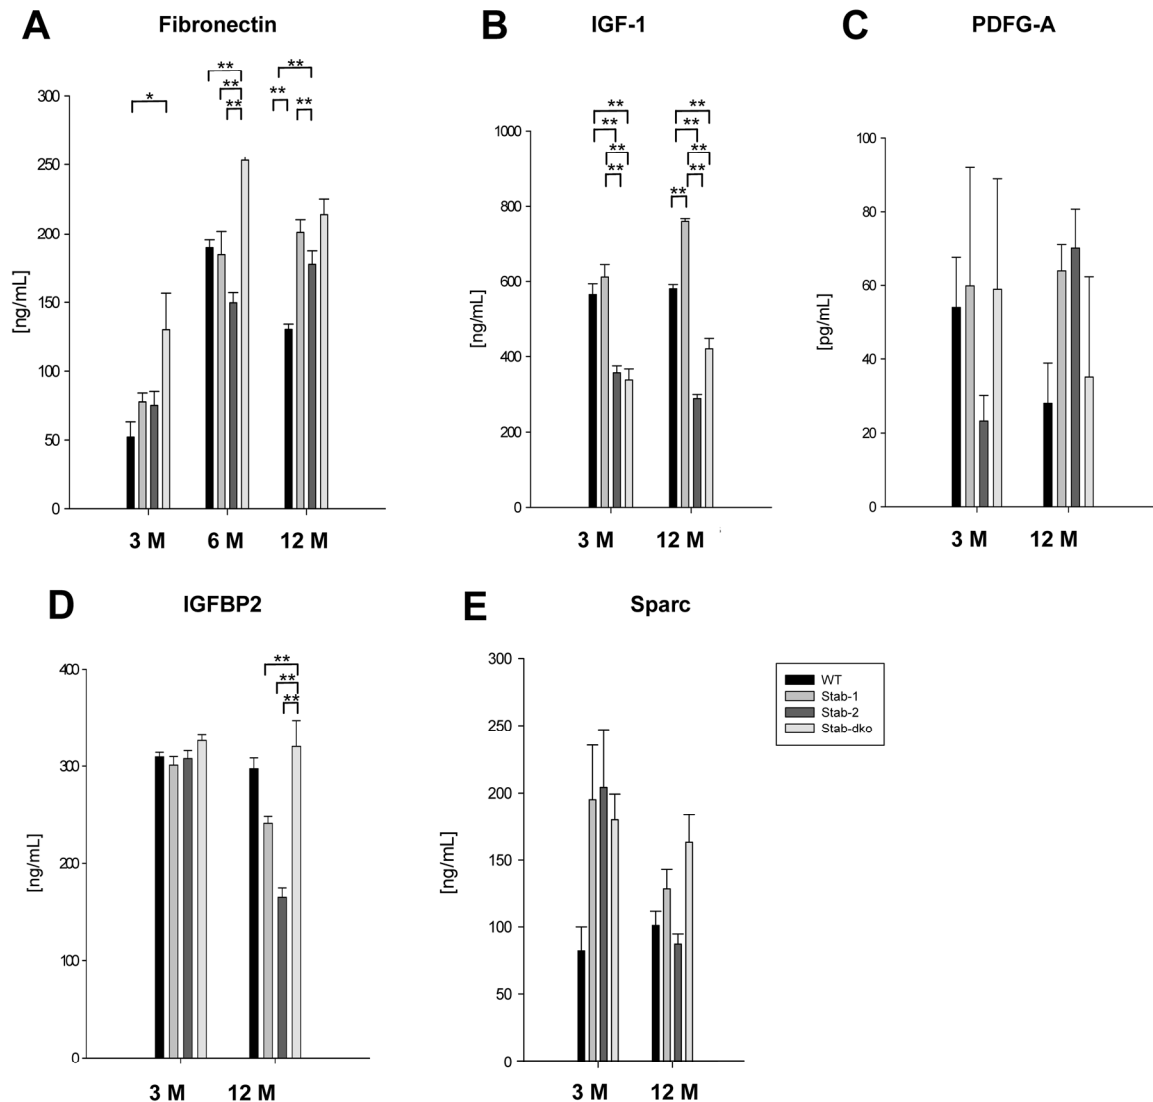

**Supplementary Figure 4**

**Serum parameter analysis associated with fibrotic disease.**

(A) Plasma of 3, 6, and 12 month old WT, stab-1, stab-2, and stab-dko mice of C57BL/6 genetic background were measured for fibronectin by ELISA. Moderately elevated levels of fibronectin were detected in stab-dko (at all ages tested) and in stab-1 and stab-2 mice at 12 months. Data represent mean  $\pm$  SEM for at least 5 mice per genotype. \* $P < 0.05$ ; \*\* $P < 0.01$ . (B-E) Plasma of 3 and 12 month old WT, stab-1, stab-2, and stab-dko mice of C57BL/6 genetic background were measured for IGF-1 (B) and PDFG-A (C) IGFBP2 (D), and SPARC (E) by ELISA. No elevated levels of profibrotic cytokines were detected in the tested stabilin animals: IGF-1 (B) showed a reduction in stab-2 and stab-dko. Data represent mean  $\pm$  SEM for at least 5 mice per genotype. \*\* $P < 0.01$ .

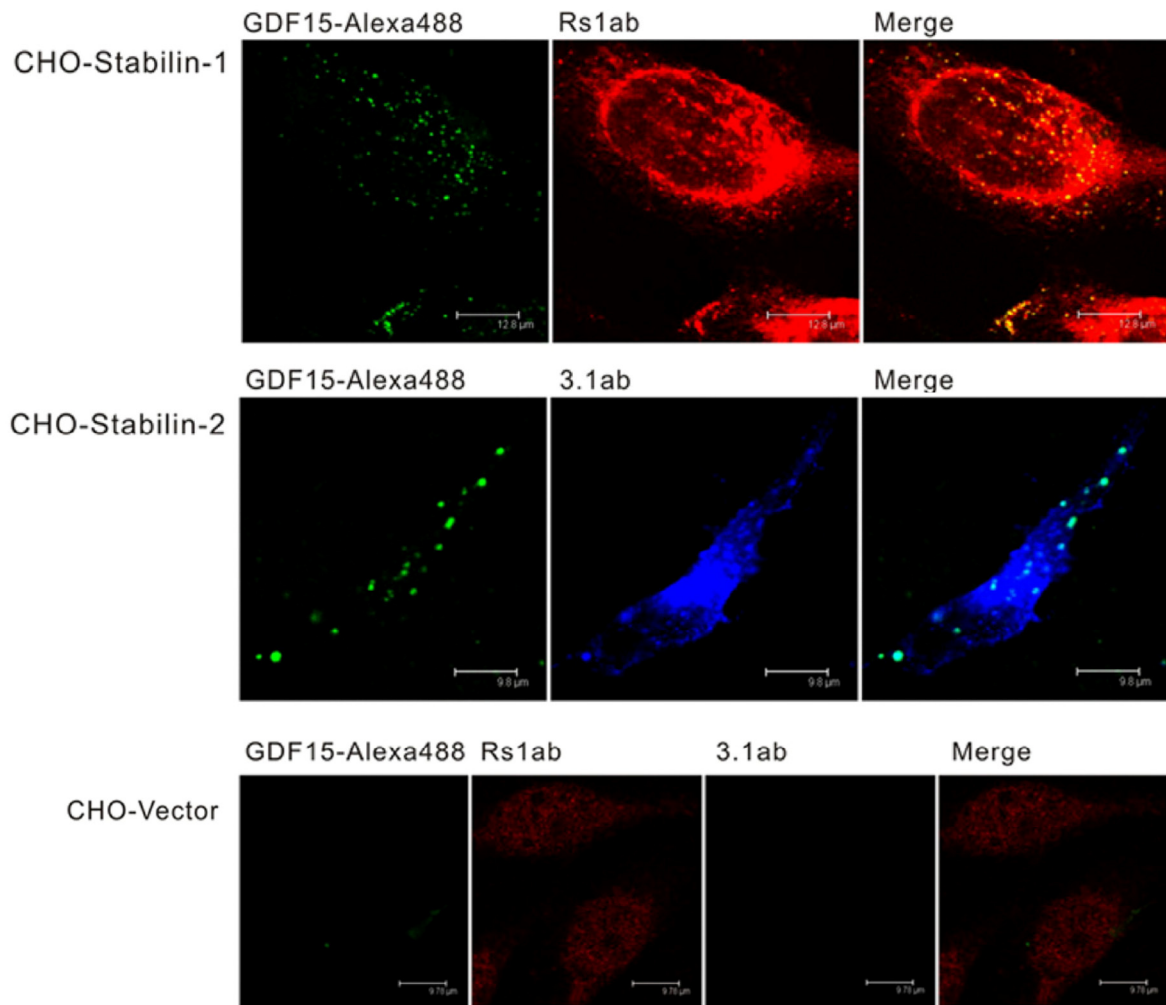

### Supplementary Figure 5

#### **Both stabilin-1 and stabilin-2 endocytose recombinant gdf-15.**

Visualisation of endocytic localisation of Alexa488-GDF-15 using immunofluorescence and confocal microscopy. Alexa488-GDF-15 is shown in green, stabilin-1 is shown in red, and stabilin-2 is shown in blue. Alexa488-GDF-15 co-localised both with stabilin-1 and stabilin-2 in endosomes. No signal in endosomes was observed in control CHO-vector cells. (n=3). Original Magnification 630x. Scale bars from top to bottom 12.8 μm; 9.8 μm; 9.78 μm.

**Supplementary Table 1:**

Survival analysis of all C57BL/6 and Balb/c stabilin knockout mouse variants. Animal groups described in detail in legend to Figure 1

| <b>C57BL/6</b>      | <b>Mean Survival [d]</b> | <b>Std. Error [d]</b>     | <b>95% Conf. Lower</b> | <b>95% Conf. Upper</b> |
|---------------------|--------------------------|---------------------------|------------------------|------------------------|
| WT                  | 803.500                  | 21.082                    | 762.181                | 844.819                |
| Stab-1              | 614.982                  | 26.181                    | 563.667                | 666.296                |
| Stab-2              | 624.727                  | 28.372                    | 569.118                | 680.336                |
| Stab-dko            | 415.159                  | 30.459                    | 355.460                | 474.858                |
|                     |                          |                           |                        |                        |
| <b>Comparisons</b>  | <b>Statistic</b>         | <b>Unadjusted P Value</b> | <b>Critical Level</b>  | <b>Significant? *</b>  |
| WT vs. Stab-dko     | 32.474                   | 0.0000000121              | 0.00851                | Yes                    |
| Stab-1 vs. Stab-dko | 20.492                   | 0.00000599                | 0.0102                 | Yes                    |
| Stab-2 vs. Stab-dko | 19.792                   | 0.00000864                | 0.0127                 | Yes                    |
| WT vs. Stab-2       | 2.481                    | 0.115                     | 0.0170                 | No                     |
| WT vs. Stab-1       | 2.325                    | 0.127                     | 0.0253                 | No                     |
| Stab-1 vs. Stab-2   | 0.0146                   | 0.904                     | 0.0500                 | No                     |
|                     |                          |                           |                        |                        |

| <b>Balb/c</b>       | <b>Mean Survival [d]</b> | <b>Std. Error [d]</b>     | <b>95% Conf. Lower</b> | <b>95% Conf. Upper</b> |
|---------------------|--------------------------|---------------------------|------------------------|------------------------|
| WT                  | 738.746                  | 11.975                    | 715.276                | 762.216                |
| Stab-1              | 584.037                  | 16.455                    | 551.786                | 616.289                |
| Stab-2              | 617.874                  | 26.686                    | 565.570                | 670.179                |
| Stab-dko            | 269.359                  | 16.960                    | 236.119                | 302.600                |
|                     |                          |                           |                        |                        |
| <b>Comparisons</b>  | <b>Statistic</b>         | <b>Unadjusted P Value</b> | <b>Critical Level</b>  | <b>Significant? *</b>  |
| WT vs. Stab-dko     | 59.072                   | 1.520E-014                | 0.00851                | Yes                    |
| Stab-1 vs. Stab-dko | 46.790                   | 7.901E-012                | 0.0102                 | Yes                    |
| Stab-2 vs. Stab-dko | 36.905                   | 0.00000000124             | 0.0127                 | Yes                    |
| WT vs. Stab-2       | 3.631                    | 0.0567                    | 0.0170                 | No                     |
| WT vs. Stab-1       | 1.178                    | 0.278                     | 0.0253                 | No                     |
| Stab-1 vs. Stab-2   | 0.374                    | 0.541                     | 0.0500                 | No                     |
|                     |                          |                           |                        |                        |

\* All Pairwise Multiple Comparison Procedures (Holm-Sidak method): Overall significance level = 0.05



**Supplementary Table 2:**

**Metabolic and physiological analysis of Stabilin-deficient animals.**

WT, stab-1, stab-2, stab-dko animals of the same genetic background (Balb/c or C57BL/6) were arranged in groups of 5-10 and followed for an observation period of up to 2 years. The table lists the values measured for a group of WT, stab-1, stab-2, stab-dko of Balb/c background measured at 6 months of age. No differences are found in mice of C57BL/6. Statistical analysis revealed no relevant differences except values measured only for urine albumine concentrations. Data represent mean ± SEM. (n=10). \*\**P* < 0.01.

|                       | Balb/c WT |         | Balb/c stab-1 |         | Balb/c stab-2 |         | Balb/c stab-dko |         |
|-----------------------|-----------|---------|---------------|---------|---------------|---------|-----------------|---------|
|                       | MEAN      | +/-     | MEAN          | +/-     | MEAN          | +/-     | MEAN            | +/-     |
| physiologic cage      |           |         |               |         |               |         |                 |         |
| food/24h [g]          | 3.69      | 1.05    | 3.93          | 1.38    | 4.01          | 0.62    | 3.53            | 0.63    |
| water/24h [g]         | 3.54      | 1.27    | 3.10          | 1.58    | 3.16          | 0.51    | 4.22            | 0.87    |
| urine/24h [g]         | 1.12      | 0.40    | 0.90          | 0.24    | 0.82          | 0.14    | 1.50            | 0.84    |
| feces/24h [g]         | 1.54      | 0.60    | 1.96          | 0.54    | 1.58          | 0.50    | 1.30            | 0.26    |
| animal weigth [g]     | 25.48     | 2.09    | 22.64         | 0.40    | 24.50         | 2.04    | 23.60           | 0.94    |
| Urine parameter       |           |         |               |         |               |         |                 |         |
| protein [mg/l]        | 2.43      | 0.83    | 3.80          | 1.19    | 2.48          | 0.59    | 6.81            | 7.03    |
| creatinine [mg/dl]    | 43.89     | 18.14   | 48.07         | 13.18   | 46.83         | 8.95    | 43.70           | 19.31   |
| urea [mg/dl]          | 11356.30  | 5514.08 | 12131.30      | 5750.65 | 16992.90      | 5165.09 | 16908.80        | 6973.46 |
| glucose [mg/dl]       | 86.30     | 42.77   | 79.40         | 26.42   | 92.60         | 17.95   | 69.30           | 35.78   |
| Albumin [mg/l]        | 26.50     | 7.49    | 30.50         | 9.20    | 35.10         | 26.47   | 1031.00 **      | 1456.13 |
| Na [mmol/l]           | 220.40    | 86.33   | 214.00        | 94.19   | 303.60        | 59.70   | 207.50          | 108.15  |
| K [mmol/l]            | 494.92    | 178.94  | 590.62        | 177.14  | 647.04        | 90.90   | 502.95          | 188.52  |
| Ca [mmol/l]           | 3.20      | 1.05    | 3.45          | 0.86    | 3.79          | 0.46    | 3.68            | 1.28    |
| PO4 [mmol/l]          | 129.80    | 71.57   | 125.64        | 39.91   | 85.66         | 25.87   | 87.50           | 44.93   |
| plasma parameter      |           |         |               |         |               |         |                 |         |
| creatinin [mg/dl]     | 0.08      | 0.02    | 0.09          | 0.02    | 0.08          | 0.02    | 0.10            | 0.02    |
| urea [mg/dl]          | 73.21     | 16.51   | 71.35         | 10.43   | 53.32         | 7.47    | 58.03           | 8.48    |
| protein [g/l]         | 51.10     | 1.90    | 48.67         | 1.43    | 49.56         | 1.74    | 46.88           | 1.58    |
| Albumin [g/l]         | 33.25     | 7.073   | 27.25         | 3.092   | 39.88         | 5.52    | 24.00           | 3.91    |
| cholin esterase [u/l] | 8005.30   | 706.61  | 6859.40       | 543.59  | 6772.20       | 428.96  | 6873.10         | 582.66  |
| Glucose [mg/dl]       | 158.80    | 15.65   | 148.10        | 12.84   | 167.40        | 17.58   | 159.70          | 13.74   |
| Cholesterol [mg/dl]   | 81.10     | 8.75    | 98.80         | 10.92   | 80.60         | 8.63    | 92.20           | 14.63   |
| Triglyc.[mg/dl]       | 90.00     | 26.41   | 68.10         | 14.75   | 84.60         | 24.34   | 79.80           | 29.87   |
| AST [u/l]             | 76.07     | 11.45   | 97.27         | 25.39   | 75.01         | 14.44   | 73.37           | 11.00   |
| ALT [u/l]             | 41.38     | 16.08   | 79.50         | 47.26   | 42.22         | 32.48   | 64.22           | 34.98   |
| GLDH [u/l]            | 13.69     | 6.44    | 14.49         | 3.72    | 9.36          | 1.41    | 16.50           | 18.27   |
| ggt [u/l]             | 3.00      | 0.00    | 3.00          | 0.00    | 3.00          | 0.00    | 3.00            | 0.00    |
